# Supplementary material
Source: MDPI journal article supplement (https://www.mdpi.com/2076-3417/12/6/3002)
Supplement: s1 [file s1]

# Supplementary Materials: A Multi-Disciplinary Optimization Approach to Eco-Friendly Design Using the Response Surface Method

Cheng-Jung Yang <sup>1,\*</sup>, Lin Mei Jyun <sup>2</sup> and Jahau Lewis Chen <sup>3</sup>

**Table S1.** The environmental impact of the 50 combinations in fossil fuels.

| Num. | $X_1$ (mm) | $X_2$ (mm) | $X_3$ | $V_1(X)$ (mpt) |
|------|------------|------------|-------|----------------|
| 1    | 0.2        | 0.2        | 1     | 1.05           |
| 2    | 0.2        | 0.25       | 1     | 1.12           |
| 3    | 0.2        | 0.3        | 1     | 1.2            |
| 4    | 0.2        | 0.35       | 1     | 1.28           |
| 5    | 0.2        | 0.4        | 1     | 1.35           |
| 6    | 0.25       | 0.2        | 1     | 1.19           |
| 7    | 0.25       | 0.25       | 1     | 1.26           |
| 8    | 0.25       | 0.3        | 1     | 1.33           |
| 9    | 0.25       | 0.35       | 1     | 1.41           |
| 10   | 0.25       | 0.4        | 1     | 1.49           |
| 11   | 0.3        | 0.2        | 1     | 1.32           |
| 12   | 0.3        | 0.25       | 1     | 1.4            |
| 13   | 0.3        | 0.3        | 1     | 1.47           |
| 14   | 0.3        | 0.35       | 1     | 1.55           |
| 15   | 0.3        | 0.4        | 1     | 1.63           |
| 16   | 0.35       | 0.2        | 1     | 1.46           |
| 17   | 0.35       | 0.25       | 1     | 1.54           |
| 18   | 0.35       | 0.3        | 1     | 1.62           |
| 19   | 0.35       | 0.35       | 1     | 1.69           |
| 20   | 0.35       | 0.4        | 1     | 1.77           |
| 21   | 0.4        | 0.2        | 1     | 1.6            |
| 22   | 0.4        | 0.25       | 1     | 1.67           |
| 23   | 0.4        | 0.3        | 1     | 1.74           |
| 24   | 0.4        | 0.35       | 1     | 1.83           |
| 25   | 0.4        | 0.4        | 1     | 1.9            |
| 26   | 0.2        | 0.2        | 2     | 1.21           |
| 27   | 0.2        | 0.25       | 2     | 1.3            |
| 28   | 0.2        | 0.3        | 2     | 1.39           |
| 29   | 0.2        | 0.35       | 2     | 1.48           |
| 30   | 0.2        | 0.4        | 2     | 1.57           |
| 31   | 0.25       | 0.2        | 2     | 1.37           |
| 32   | 0.25       | 0.25       | 2     | 1.46           |
| 33   | 0.25       | 0.3        | 2     | 1.55           |
| 34   | 0.25       | 0.35       | 2     | 1.64           |
| 35   | 0.25       | 0.4        | 2     | 1.73           |
| 36   | 0.3        | 0.2        | 2     | 1.53           |
| 37   | 0.3        | 0.25       | 2     | 1.62           |
| 38   | 0.3        | 0.3        | 2     | 1.71           |

|    |      |      |   |      |
|----|------|------|---|------|
| 39 | 0.3  | 0.35 | 2 | 1.8  |
| 40 | 0.3  | 0.4  | 2 | 1.89 |
| 41 | 0.35 | 0.2  | 2 | 1.69 |
| 42 | 0.35 | 0.25 | 2 | 1.78 |
| 43 | 0.35 | 0.3  | 2 | 1.88 |
| 44 | 0.35 | 0.35 | 2 | 1.96 |
| 45 | 0.35 | 0.4  | 2 | 2.05 |
| 46 | 0.4  | 0.2  | 2 | 1.86 |
| 47 | 0.4  | 0.25 | 2 | 1.94 |
| 48 | 0.4  | 0.3  | 2 | 2.03 |
| 49 | 0.4  | 0.35 | 2 | 2.13 |
| 50 | 0.4  | 0.4  | 2 | 2.21 |

**Table S2.** Regression coefficients of first order model- the environmental impact in fossil fuels.

| Type       | Unstandardized coefficients |                | Standardized coefficient | t      | Significant |
|------------|-----------------------------|----------------|--------------------------|--------|-------------|
|            | B( $\beta$ )                | Standard error | Beta                     |        |             |
| (Constant) | -0.155                      | 0.021          |                          | -7.391 | 0.000       |
| $X_1$      | 2.981                       | 0.045          | 0.768                    | 66.741 | 0.000       |
| $X_2$      | 1.665                       | 0.045          | 0.423                    | 36.789 | 0.000       |
| $X_3$      | 0.236                       | 0.006          | 0.426                    | 37.105 | 0.000       |

**Table S3.** Regression coefficients of first order model with interaction- the environmental impact in fossil fuels.

| Type       | Unstandardized coefficients |                | Standardized coefficient | t      | Significant |
|------------|-----------------------------|----------------|--------------------------|--------|-------------|
|            | B( $\beta$ )                | Standard error | Beta                     |        |             |
| (Constant) | 0.188                       | 0.015          |                          | 12.166 | 0.000       |
| $X_1$      | 2.25                        | 0.044          | 0.579                    | 48.86  | 0.000       |
| $X_2$      | 1.217                       | 0.046          | 0.309                    | 27.507 | 0.000       |
| $X_3$      | $1.396 \times 10^{-2}$      | 0.007          | 0.025                    | 2.036  | 0.049       |
| $X_1X_2$   | 0.113                       | 0.123          | 0.013                    | 0.923  | 0.362       |
| $X_1X_3$   | 0.464                       | 0.016          | 0.313                    | 28.43  | 0.000       |
| $X_2X_3$   | 0.276                       | 0.017          | 0.188                    | 16.707 | 0.000       |

**Table S4.** Regression coefficients of second order model- the environmental impact in fossil fuels.

| Type       | Unstandardized coefficients |                | Standardized coefficient | t      | Significant |
|------------|-----------------------------|----------------|--------------------------|--------|-------------|
|            | B( $\beta$ )                | Standard error | Beta                     |        |             |
| (Constant) | 0.193                       | 0.021          |                          | 9.249  | 0.000       |
| $X_1$      | 2.293                       | 0.094          | 0.590                    | 24.469 | 0.000       |
| $X_2$      | 1.205                       | 0.093          | 0.306                    | 12.989 | 0.000       |
| $X_1X_2$   | 0.122                       | 0.129          | 0.014                    | 0.941  | 0.353       |
| $X_1X_3$   | 0.464                       | 0.017          | 0.313                    | 27.775 | 0.000       |

|          |                         |       |        |        |       |
|----------|-------------------------|-------|--------|--------|-------|
| $X_2X_3$ | 0.276                   | 0.017 | 0.188  | 16.322 | 0.000 |
| $X_1X_1$ | $-7.762 \times 10^{-2}$ | 0.148 | -0.012 | -0.523 | 0.604 |
| $X_2X_2$ | $1.640 \times 10^{-2}$  | 0.144 | 0.003  | 0.114  | 0.910 |
| $X_3X_3$ | $4.652 \times 10^{-3}$  | 0.002 | 0.025  | 1.989  | 0.055 |

**Table S4.** The error rate of the training and validation set - first order model.

Training set :

| Num. | Real value (mpt) | Value from the regression equation (mpt) | Error rate |
|------|------------------|------------------------------------------|------------|
| 1    | 1.05             | 1.0102                                   | 0.0379     |
| 2    | 1.12             | 1.09345                                  | 0.0237     |
| 3    | 1.2              | 1.1767                                   | 0.0194     |
| 4    | 1.28             | 1.25995                                  | 0.0157     |
| 5    | 1.35             | 1.3432                                   | 0.0050     |
| 6    | 1.19             | 1.15925                                  | 0.0258     |
| 8    | 1.33             | 1.32575                                  | 0.0032     |
| 9    | 1.41             | 1.409                                    | 0.0007     |
| 10   | 1.49             | 1.49225                                  | 0.0015     |
| 11   | 1.32             | 1.3083                                   | 0.0087     |
| 12   | 1.4              | 1.39155                                  | 0.0060     |
| 13   | 1.47             | 1.4748                                   | 0.0033     |
| 15   | 1.63             | 1.6413                                   | 0.0069     |
| 16   | 1.46             | 1.45735                                  | 0.0018     |
| 17   | 1.54             | 1.5406                                   | 0.0004     |
| 18   | 1.62             | 1.62385                                  | 0.0024     |
| 19   | 1.69             | 1.7071                                   | 0.0101     |
| 20   | 1.77             | 1.79035                                  | 0.0115     |
| 22   | 1.67             | 1.68965                                  | 0.0118     |
| 23   | 1.74             | 1.7729                                   | 0.0189     |
| 24   | 1.83             | 1.85615                                  | 0.0143     |
| 25   | 1.9              | 1.9394                                   | 0.0207     |
| 26   | 1.21             | 1.2462                                   | 0.0299     |
| 27   | 1.3              | 1.32945                                  | 0.0227     |
| 28   | 1.39             | 1.4127                                   | 0.0163     |
| 29   | 1.48             | 1.49595                                  | 0.0108     |
| 30   | 1.57             | 1.5792                                   | 0.0059     |
| 31   | 1.37             | 1.39525                                  | 0.0184     |
| 33   | 1.55             | 1.56175                                  | 0.0076     |
| 34   | 1.64             | 1.645                                    | 0.0031     |
| 35   | 1.73             | 1.72825                                  | 0.0010     |
| 36   | 1.53             | 1.5443                                   | 0.0094     |
| 37   | 1.62             | 1.62755                                  | 0.0047     |
| 38   | 1.71             | 1.7108                                   | 0.0005     |
| 40   | 1.89             | 1.8773                                   | 0.0067     |
| 41   | 1.69             | 1.69335                                  | 0.0020     |
| 42   | 1.78             | 1.7766                                   | 0.0019     |
| 43   | 1.88             | 1.85985                                  | 0.0107     |
| 44   | 1.96             | 1.9431                                   | 0.0086     |

|    |      |         |        |
|----|------|---------|--------|
| 45 | 2.05 | 2.02635 | 0.0115 |
| 47 | 1.94 | 1.92565 | 0.0074 |
| 48 | 2.03 | 2.0089  | 0.0104 |
| 49 | 2.13 | 2.09215 | 0.0178 |
| 50 | 2.21 | 2.1754  | 0.0157 |

Validation set :

| Num. | Real value (mpt) | Value from the regression equation (mpt) | Error rate |
|------|------------------|------------------------------------------|------------|
| 7    | 1.26             | 1.2425                                   | 0.0139     |
| 14   | 1.55             | 1.55805                                  | 0.0052     |
| 21   | 1.6              | 1.6064                                   | 0.004      |
| 32   | 1.46             | 1.4785                                   | 0.0127     |
| 39   | 1.8              | 1.79405                                  | 0.0033     |
| 46   | 1.86             | 1.8424                                   | 0.0095     |

**Table S6.** The error rate of the training and validation set- first order model with interaction.

Training set :

| Num. | Real value (mpt) | Value from the regression equation (mpt) | Error rate |
|------|------------------|------------------------------------------|------------|
| 1    | 1.05             | 1.04788                                  | 0.0020     |
| 2    | 1.12             | 1.12366                                  | 0.0033     |
| 3    | 1.2              | 1.19944                                  | 0.0005     |
| 4    | 1.28             | 1.27522                                  | 0.0037     |
| 5    | 1.35             | 1.351                                    | 0.0007     |
| 6    | 1.19             | 1.18471                                  | 0.0044     |
| 8    | 1.33             | 1.336835                                 | 0.0051     |
| 9    | 1.41             | 1.412898                                 | 0.0021     |
| 10   | 1.49             | 1.48896                                  | 0.0007     |
| 11   | 1.32             | 1.32154                                  | 0.0012     |
| 12   | 1.4              | 1.397885                                 | 0.0015     |
| 13   | 1.47             | 1.47423                                  | 0.0029     |
| 15   | 1.63             | 1.62692                                  | 0.0019     |
| 16   | 1.46             | 1.45837                                  | 0.0011     |
| 17   | 1.54             | 1.534998                                 | 0.0033     |
| 18   | 1.62             | 1.611625                                 | 0.0052     |
| 19   | 1.69             | 1.688253                                 | 0.0010     |
| 20   | 1.77             | 1.76488                                  | 0.0029     |
| 22   | 1.67             | 1.67211                                  | 0.0013     |
| 23   | 1.74             | 1.74902                                  | 0.0052     |
| 24   | 1.83             | 1.82593                                  | 0.0022     |
| 25   | 1.9              | 1.90284                                  | 0.0015     |
| 26   | 1.21             | 1.20984                                  | 0.0001     |
| 27   | 1.3              | 1.29942                                  | 0.0005     |
| 28   | 1.39             | 1.389                                    | 0.0007     |
| 29   | 1.48             | 1.47858                                  | 0.0001     |
| 30   | 1.57             | 1.56816                                  | 0.0012     |
| 31   | 1.37             | 1.36987                                  | 0.0001     |

|    |      |          |        |
|----|------|----------|--------|
| 33 | 1.55 | 1.549595 | 0.0003 |
| 34 | 1.64 | 1.639458 | 0.0003 |
| 35 | 1.73 | 1.72932  | 0.0004 |
| 36 | 1.53 | 1.5299   | 0.0001 |
| 37 | 1.62 | 1.620045 | 0.0001 |
| 38 | 1.71 | 1.71019  | 0.0001 |
| 40 | 1.89 | 1.89048  | 0.0003 |
| 41 | 1.69 | 1.68993  | 0.0001 |
| 42 | 1.78 | 1.780358 | 0.0002 |
| 43 | 1.88 | 1.870785 | 0.0049 |
| 44 | 1.96 | 1.961213 | 0.0006 |
| 45 | 2.05 | 2.05164  | 0.0008 |
| 47 | 1.94 | 1.94067  | 0.0004 |
| 48 | 2.03 | 2.03138  | 0.0007 |
| 49 | 2.13 | 2.12209  | 0.0037 |
| 50 | 2.21 | 2.2128   | 0.0013 |

Validation set :

| Num. | Real value (mpt) | Value from the regression equation (mpt) | Error rate |
|------|------------------|------------------------------------------|------------|
| 7    | 1.26             | 1.260773                                 | 0.0006     |
| 14   | 1.55             | 1.550575                                 | 0.0004     |
| 21   | 1.6              | 1.5952                                   | 0.003      |
| 32   | 1.46             | 1.459733                                 | 0.0002     |
| 39   | 1.8              | 1.800335                                 | 0.0002     |
| 46   | 1.86             | 1.84996                                  | 0.0054     |

**Table S7.** The error rate of the training and validation set- second order model.

Training set :

| Num. | Real value (mpt) | Value from the regression equation (mpt) | Error rate |
|------|------------------|------------------------------------------|------------|
| 1    | 1.05             | 1.04768                                  | 0.0022     |
| 2    | 1.12             | 1.12332                                  | 0.0030     |
| 3    | 1.2              | 1.19904                                  | 0.0008     |
| 4    | 1.28             | 1.27485                                  | 0.0040     |
| 5    | 1.35             | 1.35073                                  | 0.0005     |
| 6    | 1.19             | 1.18501                                  | 0.0042     |
| 8    | 1.33             | 1.33698                                  | 0.0053     |
| 9    | 1.41             | 1.41308                                  | 0.0022     |
| 10   | 1.49             | 1.48927                                  | 0.0005     |
| 11   | 1.32             | 1.32194                                  | 0.0015     |
| 12   | 1.4              | 1.39819                                  | 0.0013     |
| 13   | 1.47             | 1.47452                                  | 0.0031     |
| 15   | 1.63             | 1.62743                                  | 0.0016     |
| 16   | 1.46             | 1.45849                                  | 0.0010     |
| 17   | 1.54             | 1.53504                                  | 0.0032     |
| 18   | 1.62             | 1.61168                                  | 0.0051     |
| 19   | 1.69             | 1.6884                                   | 0.0001     |

|    |      |         |        |
|----|------|---------|--------|
| 20 | 1.77 | 1.7652  | 0.0027 |
| 22 | 1.67 | 1.67151 | 0.0009 |
| 23 | 1.74 | 1.74845 | 0.0049 |
| 24 | 1.83 | 1.82547 | 0.0025 |
| 25 | 1.9  | 1.90258 | 0.0014 |
| 26 | 1.21 | 1.20964 | 0.0003 |
| 27 | 1.3  | 1.29908 | 0.0007 |
| 28 | 1.39 | 1.3886  | 0.0010 |
| 29 | 1.48 | 1.4782  | 0.0012 |
| 30 | 1.57 | 1.56789 | 0.0014 |
| 31 | 1.37 | 1.37016 | 0.0001 |
| 33 | 1.55 | 1.54973 | 0.0002 |
| 34 | 1.64 | 1.63964 | 0.0002 |
| 35 | 1.73 | 1.72963 | 0.0002 |
| 36 | 1.53 | 1.5303  | 0.0002 |
| 37 | 1.62 | 1.62035 | 0.0002 |
| 38 | 1.71 | 1.71048 | 0.0003 |
| 40 | 1.89 | 1.89099 | 0.0005 |
| 41 | 1.69 | 1.69005 | 0.0001 |
| 42 | 1.78 | 1.7804  | 0.0002 |
| 43 | 1.88 | 1.87084 | 0.0049 |
| 44 | 1.96 | 1.96135 | 0.0007 |
| 45 | 2.05 | 2.05195 | 0.0010 |
| 47 | 1.94 | 1.94006 | 0.0001 |
| 48 | 2.03 | 2.0308  | 0.0004 |
| 49 | 2.13 | 2.12163 | 0.0039 |
| 50 | 2.21 | 2.21253 | 0.0012 |

Validation set :

| Num. | Real value (mpt) | Value from the regression equation (mpt) | Error rate |
|------|------------------|------------------------------------------|------------|
| 7    | 1.26             | 1.26095                                  | 0.0008     |
| 14   | 1.55             | 1.55094                                  | 0.0006     |
| 21   | 1.6              | 1.59465                                  | 0.0033     |
| 32   | 1.46             | 1.45991                                  | 0.0001     |
| 39   | 1.8              | 1.80099                                  | 0.0004     |
| 46   | 1.86             | 1.8494                                   | 0.0057     |

**Table S8.** The von Mises stress of the 50 combinations.

| Num. | X1<br>(mm) | X2<br>(mm) | X3 | $V_2(X)$<br>( $N/m^2$ ) |
|------|------------|------------|----|-------------------------|
| 1    | 0.2        | 0.2        | 1  | 432,135                 |
| 2    | 0.2        | 0.25       | 1  | 416,256                 |

|    |      |      |   |         |
|----|------|------|---|---------|
| 3  | 0.2  | 0.3  | 1 | 404,152 |
| 4  | 0.2  | 0.35 | 1 | 375,440 |
| 5  | 0.2  | 0.4  | 1 | 378,131 |
| 6  | 0.25 | 0.2  | 1 | 339,780 |
| 7  | 0.25 | 0.25 | 1 | 319,873 |
| 8  | 0.25 | 0.3  | 1 | 312,276 |
| 9  | 0.25 | 0.35 | 1 | 300,124 |
| 10 | 0.25 | 0.4  | 1 | 285,044 |
| 11 | 0.3  | 0.2  | 1 | 268,330 |
| 12 | 0.3  | 0.25 | 1 | 253,967 |
| 13 | 0.3  | 0.3  | 1 | 244,413 |
| 14 | 0.3  | 0.35 | 1 | 234,161 |
| 15 | 0.3  | 0.4  | 1 | 225,472 |
| 16 | 0.35 | 0.2  | 1 | 215,284 |
| 17 | 0.35 | 0.25 | 1 | 203,642 |
| 18 | 0.35 | 0.3  | 1 | 198,346 |
| 19 | 0.35 | 0.35 | 1 | 188,879 |
| 20 | 0.35 | 0.4  | 1 | 185,665 |
| 21 | 0.4  | 0.2  | 1 | 172,827 |
| 22 | 0.4  | 0.25 | 1 | 167,622 |
| 23 | 0.4  | 0.3  | 1 | 161,136 |
| 24 | 0.4  | 0.35 | 1 | 152,111 |
| 25 | 0.4  | 0.4  | 1 | 151,569 |
| 26 | 0.2  | 0.2  | 2 | 432,188 |
| 27 | 0.2  | 0.25 | 2 | 416,088 |
| 28 | 0.2  | 0.3  | 2 | 403,994 |
| 29 | 0.2  | 0.35 | 2 | 375,348 |
| 30 | 0.2  | 0.4  | 2 | 377,948 |
| 31 | 0.25 | 0.2  | 2 | 339,424 |
| 32 | 0.25 | 0.25 | 2 | 319,611 |
| 33 | 0.25 | 0.3  | 2 | 311,985 |
| 34 | 0.25 | 0.35 | 2 | 299,783 |
| 35 | 0.25 | 0.4  | 2 | 284,873 |
| 36 | 0.3  | 0.2  | 2 | 267,931 |
| 37 | 0.3  | 0.25 | 2 | 253,488 |
| 38 | 0.3  | 0.3  | 2 | 244,154 |
| 39 | 0.3  | 0.35 | 2 | 233,797 |
| 40 | 0.3  | 0.4  | 2 | 226,084 |
| 41 | 0.35 | 0.2  | 2 | 214,891 |
| 42 | 0.35 | 0.25 | 2 | 204,438 |
| 43 | 0.35 | 0.3  | 2 | 197,969 |
| 44 | 0.35 | 0.35 | 2 | 188,555 |
| 45 | 0.35 | 0.4  | 2 | 186,488 |
| 46 | 0.4  | 0.2  | 2 | 172,497 |
| 47 | 0.4  | 0.25 | 2 | 167,359 |
| 48 | 0.4  | 0.3  | 2 | 160,787 |
| 49 | 0.4  | 0.35 | 2 | 151,822 |
| 50 | 0.4  | 0.4  | 2 | 151,248 |

**Table S9.** Regression coefficients of first order model- the von Mises stress.

| Type       | Unstandardized coefficients |                | Standardized coefficient | t       | Significant |
|------------|-----------------------------|----------------|--------------------------|---------|-------------|
|            | B( $\beta$ )                | Standard error | Beta                     |         |             |
| (Constant) | 683,365.192                 | 16,920.139     |                          | 40.388  | .000        |
| $X_1$      | -1,199,420.3                | 35,923.954     | -0.960                   | -33.388 | .000        |
| $X_2$      | -196,287.756                | 36,386.792     | -0.155                   | -5.394  | .000        |
| $X_3$      | -133.136                    | 5122.758       | -0.001                   | -0.026  | .979        |

**Table S10.** Regression coefficients of first order model with interaction- the von Mises stress.

| Type       | Unstandardized coefficients |                | Standardized coefficient | t      | Significant |
|------------|-----------------------------|----------------|--------------------------|--------|-------------|
|            | B( $\beta$ )                | Standard error | Beta                     |        |             |
| (Constant) | 814,125.101                 | 64,152.317     |                          | 12.691 | .000        |
| $X_1$      | -1,648,210.1                | 190,833.162    | -1.320                   | -8.637 | .000        |
| $X_2$      | -618,513.711                | 183,379.892    | -0.489                   | -3.373 | .002        |
| $X_3$      | -554.836                    | 28,403.277     | -0.003                   | -0.020 | .985        |
| $X_1X_2$   | 1,444,079.254               | 508,385.181    | 0.512                    | 2.841  | .007        |
| $X_1X_3$   | -5.310                      | 67,687.001     | 0.000                    | 0.000  | 1.00        |
| $X_2X_3$   | 1389.877                    | 68,559.068     | 0.003                    | 0.020  | .984        |

**Table S11.** Regression coefficients of second order model - the von Mises stress.

| Type       | Unstandardized coefficients |             | Standardized coefficient | t       | Significant |
|------------|-----------------------------|-------------|--------------------------|---------|-------------|
|            | B( $\beta$ )                | Std. Error  | Beta                     |         |             |
| (Constant) | 1,095,087.928               | 20,528.371  |                          | 53.345  | .000        |
| $X_1$      | -3,586,671.207              | 92,131.424  | -2.872                   | -38.930 | .000        |
| $X_2$      | -685,783.288                | 91,204.034  | -0.542                   | -7.519  | .000        |
| $X_1X_2$   | 915,672.330                 | 126,986.070 | 0.325                    | 7.211   | .000        |
| $X_1X_3$   | -5.310                      | 16432.607   | 0.000                    | 0.000   | 1.000       |
| $X_2X_3$   | 1389.877                    | 16,644.321  | 0.003                    | 0.084   | .934        |
| $X_1X_1$   | 3,542,698.597               | 145,812.134 | 1.694                    | 24.296  | .000        |
| $X_2X_2$   | 330,058.479                 | 141,922.079 | 0.159                    | 2.326   | .026        |
| $X_3X_3$   | -184.945                    | 2298.521    | -0.003                   | -0.080  | .936        |

**Table S12.** The error rate of the training and validation set - first order model

Training set :

| Num. | Real value ( $N/m^2$ ) | Value from the regression equation ( $N/m^2$ ) | Error rate |
|------|------------------------|------------------------------------------------|------------|
| 1    | 432,135                | 404,090.4                                      | 0.0649     |
| 2    | 416,256                | 394,276.1                                      | 0.0528     |
| 3    | 404,152                | 384,461.7                                      | 0.0487     |
| 4    | 375,440                | 374,647.3                                      | 0.0021     |



|    |         |           |        |
|----|---------|-----------|--------|
| 5  | 378,131 | 364,832.9 | 0.0352 |
| 6  | 339,780 | 344,119.4 | 0.0128 |
| 8  | 312,276 | 324,490.7 | 0.0391 |
| 9  | 300,124 | 314,676.3 | 0.0485 |
| 10 | 285,044 | 304,861.9 | 0.0695 |
| 11 | 268,330 | 284,148.4 | 0.0590 |
| 12 | 253,967 | 274,334   | 0.0802 |
| 13 | 244,413 | 264,519.6 | 0.0823 |
| 15 | 225,472 | 244,890.9 | 0.0861 |
| 16 | 215,284 | 224,177.4 | 0.0413 |
| 17 | 203,642 | 214,363   | 0.0527 |
| 18 | 198,346 | 204,548.6 | 0.0313 |
| 19 | 188,879 | 194,734.2 | 0.031  |
| 20 | 185,665 | 184,919.8 | 0.0040 |
| 22 | 167,622 | 154,392   | 0.0789 |
| 23 | 161,136 | 144,577.6 | 0.1028 |
| 24 | 152,111 | 134,763.2 | 0.1140 |
| 25 | 151,569 | 124,948.8 | 0.1756 |
| 26 | 432,188 | 403,957.3 | 0.0653 |
| 27 | 416,088 | 394,142.9 | 0.0527 |
| 28 | 403,994 | 384,328.5 | 0.0487 |
| 29 | 375,348 | 374,514.1 | 0.0022 |
| 30 | 377,948 | 364,699.8 | 0.0351 |
| 31 | 339,424 | 343,986.3 | 0.0134 |
| 33 | 311,985 | 324,357.5 | 0.0397 |
| 34 | 299,783 | 314,543.1 | 0.0492 |
| 35 | 284,873 | 304,728.7 | 0.0697 |
| 36 | 267,931 | 284,015.3 | 0.0600 |
| 37 | 253,488 | 274,200.9 | 0.0817 |
| 38 | 244,154 | 264,386.5 | 0.0829 |
| 40 | 226,084 | 244,757.7 | 0.0826 |
| 41 | 214,891 | 224,044.3 | 0.0426 |
| 42 | 204,438 | 214,229.9 | 0.0479 |
| 43 | 197,969 | 204,415.5 | 0.0326 |
| 44 | 188,555 | 194,601.1 | 0.0321 |
| 45 | 186,488 | 184,786.7 | 0.0091 |
| 47 | 167,359 | 154,258.9 | 0.0783 |
| 48 | 160,787 | 144,444.5 | 0.1016 |
| 49 | 151,822 | 134,630.1 | 0.1132 |
| 50 | 151,248 | 124,815.7 | 0.1748 |

Validation set :

| Num. | Real value ( $N/m^2$ ) | Value from the regression equation ( $N/m^2$ ) | Error rate |
|------|------------------------|------------------------------------------------|------------|
| 7    | 319,873                | 334,305                                        | 0.0451     |
| 14   | 234,161                | 254,705.3                                      | 0.0877     |
| 21   | 172,827                | 164,206.4                                      | 0.0499     |
| 32   | 319,611                | 334,171.9                                      | 0.0456     |
| 39   | 233,797                | 254,572.1                                      | 0.0889     |
| 46   | 172,497                | 164,073.2                                      | 0.0488     |

**Table S13.** The error rate of the training and validation set- first order model with interactionTraining set :

| Num. | Real value<br>( $N/m^2$ ) | Value from the regression equation ( $N/m^2$ ) | Error rate |
|------|---------------------------|------------------------------------------------|------------|
| 1    | 432,135                   | 418,265.6                                      | 0.0321     |
| 2    | 416,256                   | 401,850.2                                      | 0.0346     |
| 3    | 404,152                   | 385,434.8                                      | 0.0463     |
| 4    | 375,440                   | 369,019.4                                      | 0.0171     |
| 5    | 378,131                   | 352,604                                        | 0.0675     |
| 6    | 339,780                   | 350,295.6                                      | 0.0310     |
| 8    | 312,276                   | 324,685.2                                      | 0.0397     |
| 9    | 300,124                   | 311,880                                        | 0.0392     |
| 10   | 285,044                   | 299,074.8                                      | 0.0492     |
| 11   | 268,330                   | 282,325.6                                      | 0.0522     |
| 12   | 253,967                   | 273,130.6                                      | 0.0755     |
| 13   | 244,413                   | 263,935.6                                      | 0.0799     |
| 15   | 225,472                   | 245,545.6                                      | 0.0890     |
| 16   | 215,284                   | 214,355.7                                      | 0.0043     |
| 17   | 203,642                   | 208,770.8                                      | 0.0252     |
| 18   | 198,346                   | 203,186                                        | 0.0244     |
| 19   | 188,879                   | 197,601.2                                      | 0.0462     |
| 20   | 185,665                   | 192,016.4                                      | 0.0342     |
| 22   | 167,622                   | 144,411.1                                      | 0.1385     |
| 23   | 161,136                   | 142,436.5                                      | 0.1161     |
| 24   | 152,111                   | 140,461.9                                      | 0.0766     |
| 25   | 151,569                   | 138,487.2                                      | 0.0863     |
| 26   | 432,188                   | 417,987.7                                      | 0.0329     |
| 27   | 416,088                   | 401,641.8                                      | 0.0347     |
| 28   | 403,994                   | 385,295.9                                      | 0.0463     |
| 29   | 375,348                   | 368,949.9                                      | 0.0171     |
| 30   | 377,948                   | 352,604                                        | 0.0676     |
| 31   | 339,424                   | 350,017.4                                      | 0.0312     |
| 33   | 311,985                   | 324,546                                        | 0.0403     |
| 34   | 299,783                   | 311,810.3                                      | 0.0401     |
| 35   | 284,873                   | 299,074.6                                      | 0.0499     |
| 36   | 267,931                   | 282,047.2                                      | 0.0527     |
| 37   | 253,488                   | 272,921.7                                      | 0.0767     |
| 38   | 244,154                   | 263,796.2                                      | 0.0805     |
| 40   | 226,084                   | 245,545.1                                      | 0.0861     |
| 41   | 214,891                   | 214,076.9                                      | 0.0038     |
| 42   | 204,438                   | 208,561.6                                      | 0.0202     |
| 43   | 197,969                   | 203,046.3                                      | 0.0257     |
| 44   | 188,555                   | 197,531                                        | 0.0476     |
| 45   | 186,488                   | 192,015.7                                      | 0.0296     |
| 47   | 167,359                   | 144,201.6                                      | 0.1384     |
| 48   | 160,787                   | 142,296.5                                      | 0.115      |

|    |         |           |        |
|----|---------|-----------|--------|
| 49 | 151,822 | 140,391.4 | 0.0753 |
| 50 | 151,248 | 138,486.2 | 0.0844 |

Validation set :

| Num. | Real value ( $N/m^2$ ) | Value from the regression equation ( $N/m^2$ ) | Error rate |
|------|------------------------|------------------------------------------------|------------|
| 7    | 319,873                | 337,490.4                                      | 0.0551     |
| 14   | 234,161                | 254,740.6                                      | 0.0879     |
| 21   | 172,827                | 146,385.7                                      | 0.1530     |
| 32   | 319,611                | 337,281.7                                      | 0.0553     |
| 39   | 233,797                | 254,670.6                                      | 0.0893     |
| 46   | 172,497                | 146,106.7                                      | 0.1530     |

**Table S14.** The error rate of the training and validation set- second order model

Training set :

| Num. | Real value ( $N/m^2$ ) | Value from the regression equation ( $N/m^2$ ) | Error rate |
|------|------------------------|------------------------------------------------|------------|
| 1    | 432,135                | 432,226                                        | 0.0002     |
| 2    | 416,256                | 414,590                                        | 0.004      |
| 3    | 404,152                | 398,603                                        | 0.0137     |
| 4    | 375,440                | 384,267                                        | 0.0235     |
| 5    | 378,131                | 371,581                                        | 0.0173     |
| 6    | 339,780                | 341,760                                        | 0.0058     |
| 8    | 312,276                | 312,715                                        | 0.0014     |
| 9    | 300,124                | 300,668                                        | 0.0018     |
| 10   | 285,044                | 290,272                                        | 0.0183     |
| 11   | 268,330                | 269,007                                        | 0.0025     |
| 12   | 253,967                | 255,949                                        | 0.0078     |
| 13   | 244,413                | 244,541                                        | 0.0005     |
| 15   | 225,472                | 226,676                                        | 0.0053     |
| 16   | 215,284                | 213,968                                        | 0.0061     |
| 17   | 203,642                | 203,198                                        | 0.0022     |
| 18   | 198,346                | 194,080                                        | 0.0215     |
| 19   | 188,879                | 186,611                                        | 0.0120     |
| 20   | 185,665                | 180,793                                        | 0.0262     |
| 22   | 167,622                | 168,162                                        | 0.0032     |
| 23   | 161,136                | 161,332                                        | 0.0012     |
| 24   | 152,111                | 156,153                                        | 0.0266     |
| 25   | 151,569                | 152,624                                        | 0.0070     |
| 26   | 432,188                | 431,948                                        | 0.0006     |
| 27   | 416,088                | 414,381                                        | 0.0041     |
| 28   | 403,994                | 398,464                                        | 0.0137     |
| 29   | 375,348                | 384,198                                        | 0.0236     |
| 30   | 377,948                | 371,581                                        | 0.0169     |
| 31   | 339,424                | 341,482                                        | 0.0061     |
| 33   | 311,985                | 312,576                                        | 0.0019     |
| 34   | 299,783                | 300,599                                        | 0.0027     |
| 35   | 284,873                | 290,272                                        | 0.0190     |
| 36   | 267,931                | 268,728                                        | 0.0030     |

|    |         |         |        |
|----|---------|---------|--------|
| 37 | 253,488 | 255,740 | 0.0089 |
| 38 | 244,154 | 244,401 | 0.0010 |
| 40 | 226,084 | 226,675 | 0.0026 |
| 41 | 214,891 | 213,689 | 0.0056 |
| 42 | 204,438 | 202,989 | 0.0071 |
| 43 | 197,969 | 193,940 | 0.0204 |
| 44 | 188,555 | 186,541 | 0.0107 |
| 45 | 186,488 | 180,792 | 0.0305 |
| 47 | 167,359 | 167,952 | 0.0035 |
| 48 | 160,787 | 161,192 | 0.0025 |
| 49 | 151,822 | 156,082 | 0.0281 |
| 50 | 151,248 | 152,623 | 0.0091 |

Validation set :

| <b>Num.</b> | <b>Real value (<math>N/m^2</math>)</b> | <b>Value from the regression equation (<math>N/m^2</math>)</b> | <b>Error rate</b> |
|-------------|----------------------------------------|----------------------------------------------------------------|-------------------|
| 7           | 319,873                                | 326,412                                                        | 0.0204            |
| 14          | 234,161                                | 234,783                                                        | 0.0027            |
| 21          | 172,827                                | 176,642                                                        | 0.0221            |
| 32          | 319,611                                | 326,204                                                        | 0.0206            |
| 39          | 233,797                                | 234,713                                                        | 0.0039            |
| 46          | 172,497                                | 176,363                                                        | 0.0224            |
